# Supplementary material for: Evaluation of Classic and Quantitative Imaging Features in the Differentiation of Benign and Atypical Lipomatous Soft Tissue Tumors Using a Standardized Multiparametric MRI Protocol: A Prospective Single-Centre Study in 45 Patients
Source: Curr Oncol. 2023 Mar 13;30(3):3315–28. doi: 10.3390/curroncol30030252 (PMC10047222; doi:10.3390/curroncol30030252)
Supplement: Supplementary file 1 [file curroncol-30-00252-s001.zip › curroncol-2179295-supplementary.pdf]

**Supplementary Table S1: Overview of evaluated demographic and lesion parameters**

| Parameter                                                                                            | Levels                                                                                                                                        |
|------------------------------------------------------------------------------------------------------|-----------------------------------------------------------------------------------------------------------------------------------------------|
| DEMOGRAPHY                                                                                           |                                                                                                                                               |
| Age                                                                                                  | years                                                                                                                                         |
| Sex                                                                                                  | male/female                                                                                                                                   |
| IMAGING                                                                                              |                                                                                                                                               |
| Affected region                                                                                      | head, neck, shoulder, upper arm, lower arm, hand, chest, back, abdominal wall, genital area, thigh, knee, lower leg, foot                     |
| Fascial relationship                                                                                 | epifascial, subfascial, both                                                                                                                  |
| Diameters                                                                                            | longest, orthogonal longest and shortest axis                                                                                                 |
| Volume                                                                                               | mm <sup>3</sup>                                                                                                                               |
| Circularity                                                                                          | ratio of area and perimeter based on the longest and shortest tumour axis, according to Ramajunan's approximation for the ellipsis' perimeter |
| Sphericity                                                                                           | ratio of tumour surface area to the surface area of sphere with the same volume                                                               |
| Border definition                                                                                    | sharp, partially diffuse, diffuse                                                                                                             |
| Border contour                                                                                       | smooth, lobulated                                                                                                                             |
| Altered septation morphology: architecture, density, thickening (compared to surrounding fat tissue) | absent/present                                                                                                                                |
| Maximum septation thickness                                                                          | mm                                                                                                                                            |
| Contrast enhancement pattern                                                                         | none, band-like, patchy or 'dirty', nodular, whole lesion                                                                                     |
| T2 STIR pattern                                                                                      | none, band-like, patchy or 'dirty', nodular, whole lesion                                                                                     |
| STIR polar sparing                                                                                   | absent/present                                                                                                                                |
| STIR surrounding fluid                                                                               | absent/present                                                                                                                                |
| Intralesional T2 STIR hyperintensity without surrounding fluid                                       | absent/present                                                                                                                                |
| ADC pattern                                                                                          | none, band-like, patchy or 'dirty', nodular, whole lesion                                                                                     |
| Average ADC value                                                                                    | mm <sup>2</sup> /s                                                                                                                            |
